# Supplementary material for: Clinical Significance of Mean and Pulse Pressure in Patients With Heart Failure With Preserved Ejection Fraction
Source: PubMed Central journal article supplement — Hypertension. 2021 Nov 5;79(1):241–50. doi: 10.1161/HYPERTENSIONAHA.121.17782 (PMC8654124; doi:10.1161/hypertensionaha.121.17782), 2021-11-05
Supplement: hyp-79-241-s003.pdf [file hyp-79-241-s003.pdf]

# Change of Authorship Form

(Must be completed and signed by ALL authors)

Please check all that apply

New author(s) have been added (in addition to this form, all new authors must complete the copyright transfer agreement and conflict of interest disclosure.

Change in order of authorship.

An author wishes to remove his/her name. An author's name may only be removed his/her own request and a letter signed by the author should accompany this form

Manuscript Number HYPE/2021/17782

Manuscript Title Clinical Significance of Mean and Pulse Pressure in Patients with Heart Failure with Preserved Ejection Fraction

## Former Authorship

Please list ALL AUTHORS in the same order as the original submission. For more than 12, use an extra sheet.

### Print Name

Name (1) Fang-Fei Wei  
Name (2) Yuzhong Wu  
Name (3) Ruicong Xue  
Name (4) Xin He  
Name (5) Bin Dong  
Name (6) Zhe Zhen

### Print Name

Name (7) Xuwei Chen  
Name (8) Weihaio Liang  
Name (9) Jingjing Zhao  
Name (10) Jiangui He  
Name (11) Yugang Dong  
Name (12) Jan A. Staessen  
Name (13) Chen Liu

## New Authorship

All authors must sign below agreeing to the changes in authorship. The authorship order must reflect the authorship order of the manuscript.

|                                  |                                  |                                 |
|----------------------------------|----------------------------------|---------------------------------|
| Name (1) <u>Fang-Fei Wei</u>     | Signature <u>Fang-Fei Wei</u>    | Date <u>23<sup>th</sup> Aug</u> |
| Name (2) <u>Yuzhong Wu</u>       | Signature <u>Yuzhong Wu</u>      | Date <u>23<sup>th</sup> Aug</u> |
| Name (3) <u>Ruicong Xue</u>      | Signature <u>Ruicong Xue</u>     | Date <u>23<sup>th</sup> Aug</u> |
| Name (4) <u>Xiao Liu</u>         | Signature <u>Xiao Liu</u>        | Date <u>23<sup>th</sup> Aug</u> |
| Name (5) <u>Xin He</u>           | Signature <u>Xin He</u>          | Date <u>23<sup>th</sup> Aug</u> |
| Name (6) <u>Bin Dong</u>         | Signature <u>Bin Dong</u>        | Date <u>23<sup>th</sup> Aug</u> |
| Name (7) <u>Zhe Zhen</u>         | Signature <u>Zhe Zhen</u>        | Date <u>23<sup>th</sup> Aug</u> |
| Name (8) <u>Xuwei Chen</u>       | Signature <u>Xuwei Chen</u>      | Date <u>23<sup>th</sup> Aug</u> |
| Name (9) <u>Weihaio Liang</u>    | Signature <u>Weihaio Liang</u>   | Date <u>23<sup>th</sup> Aug</u> |
| Name (10) <u>Jingjing Zhao</u>   | Signature <u>Jingjing Zhao</u>   | Date <u>23<sup>th</sup> Aug</u> |
| Name (11) <u>Jiangui He</u>      | Signature <u>Jiangui He</u>      | Date <u>23<sup>th</sup> Aug</u> |
| Name (12) <u>Yugang Dong</u>     | Signature <u>Yugang Dong</u>     | Date <u>23<sup>th</sup> Aug</u> |
| Name (13) <u>Jan A. Staessen</u> | Signature <u>Jan A. Staessen</u> | Date <u>23<sup>th</sup> Aug</u> |
| Name (14) <u>Chen Liu</u>        | Signature <u>Chen Liu</u>        | Date <u>23<sup>th</sup> Aug</u> |

Please print form and fax to 214-706-1565.
